# Supplementary material for: A two-photon AIE fluorophore as a photosensitizer for highly efficient mitochondria-targeted photodynamic therapy
Source: Royal Society of Chemistry journal article supplement (doi:10.1039/d0nj00822b), 2020-01-01
Supplement: d0nj00822b1.pdf [file d0nj00822b1.pdf]

*Supporting Information for*

**A two-photon AIE fluorophore as a photosensitizer for highly efficient  
mitochondria-targeted photodynamic therapy**

*Qunshou Kong, Boxuan Ma, Tao Yu, Cheng Hu, Gaocan Li\*, Qing Jiang\* and  
Yunbing Wang*

National Engineering Research Center for Biomaterials Chengdu, China 610064

E-mail address: gaocanli@scu.edu.cn (G.L.), jiangq@scu.edu.cn (Q.J.).

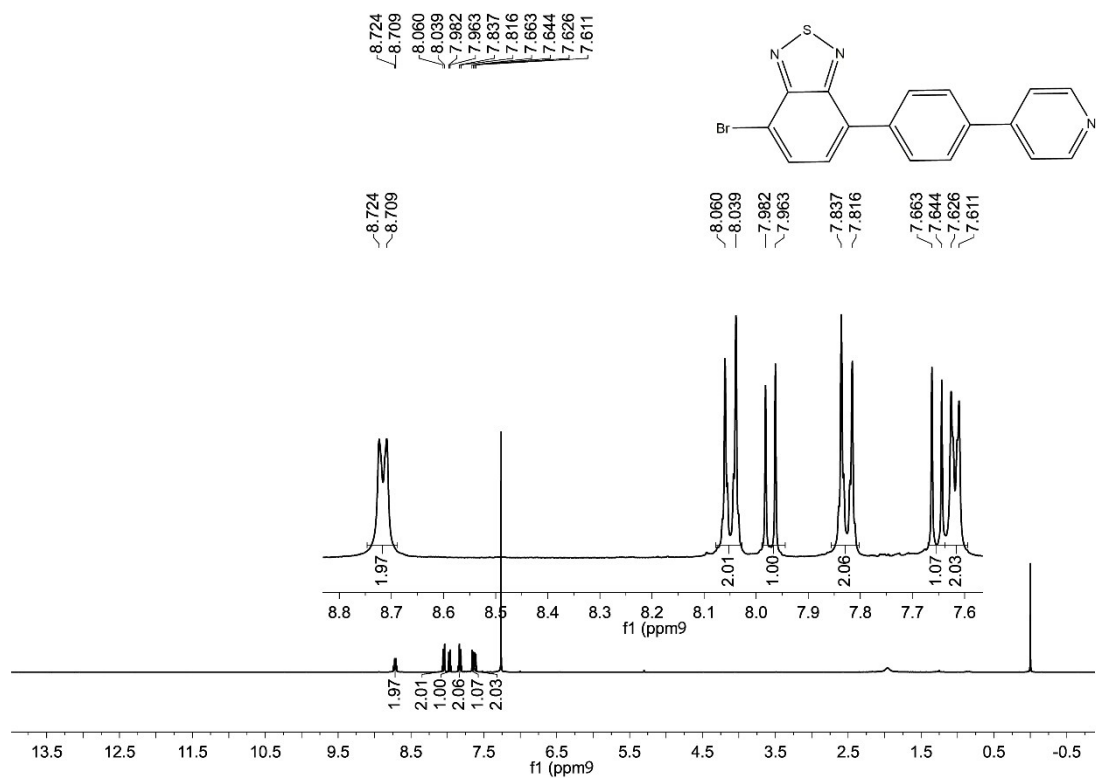

Figure S1. <sup>1</sup>H NMR spectrum of compound **1** in CDCl<sub>3</sub>.

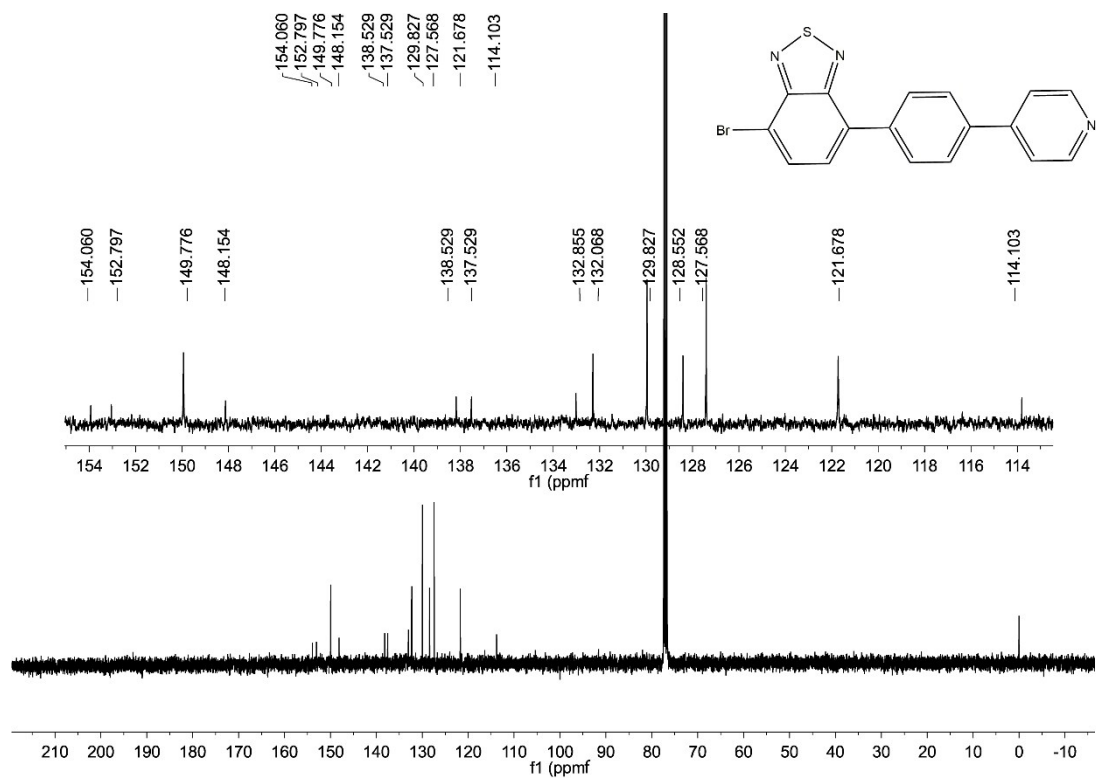

Figure S2. <sup>13</sup>C NMR spectrum of compound **1** in CDCl<sub>3</sub>.

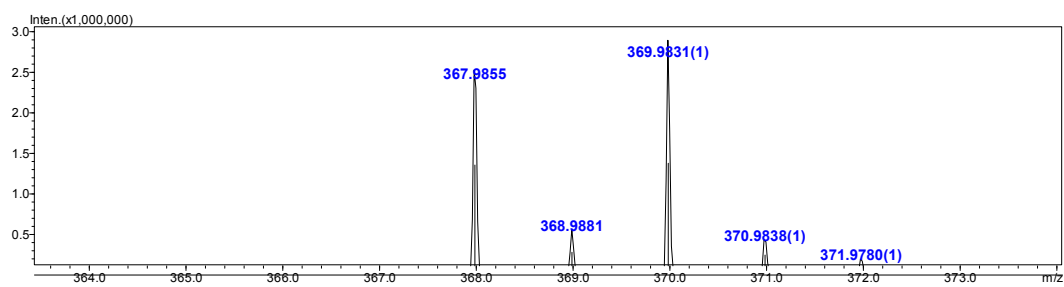

Figure S3. HRMS spectrum of compound 1.

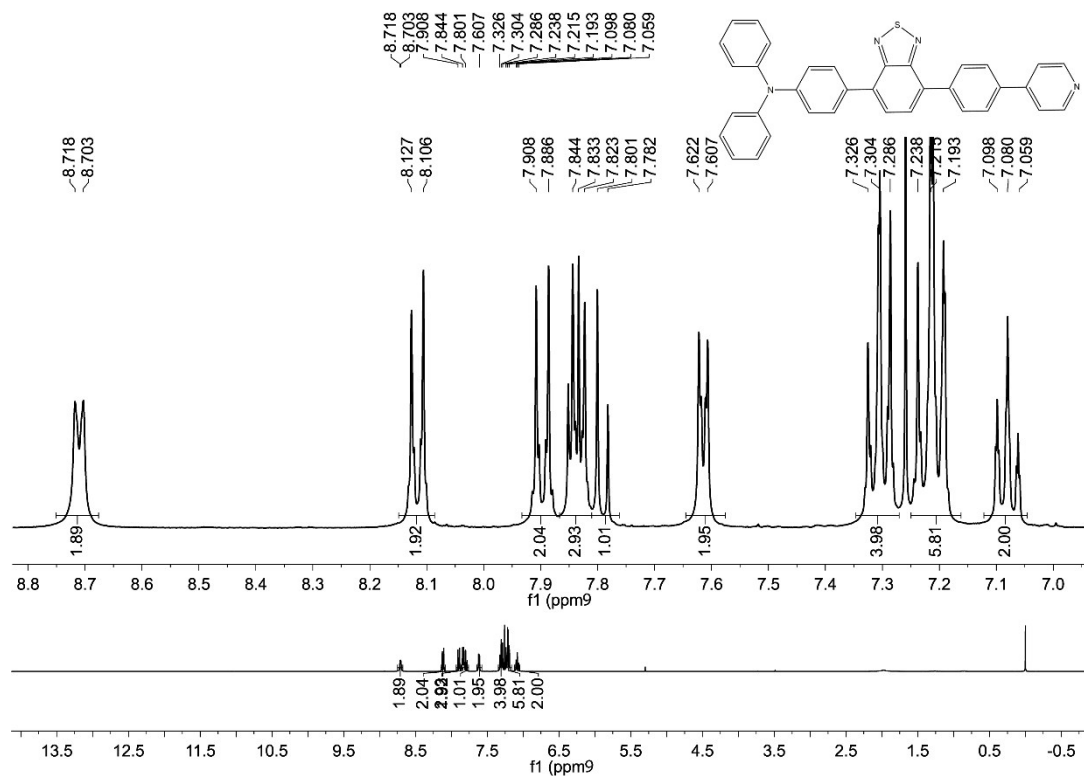

Figure S4. <sup>1</sup>H NMR spectrum of compound 2 in CDCl<sub>3</sub>.

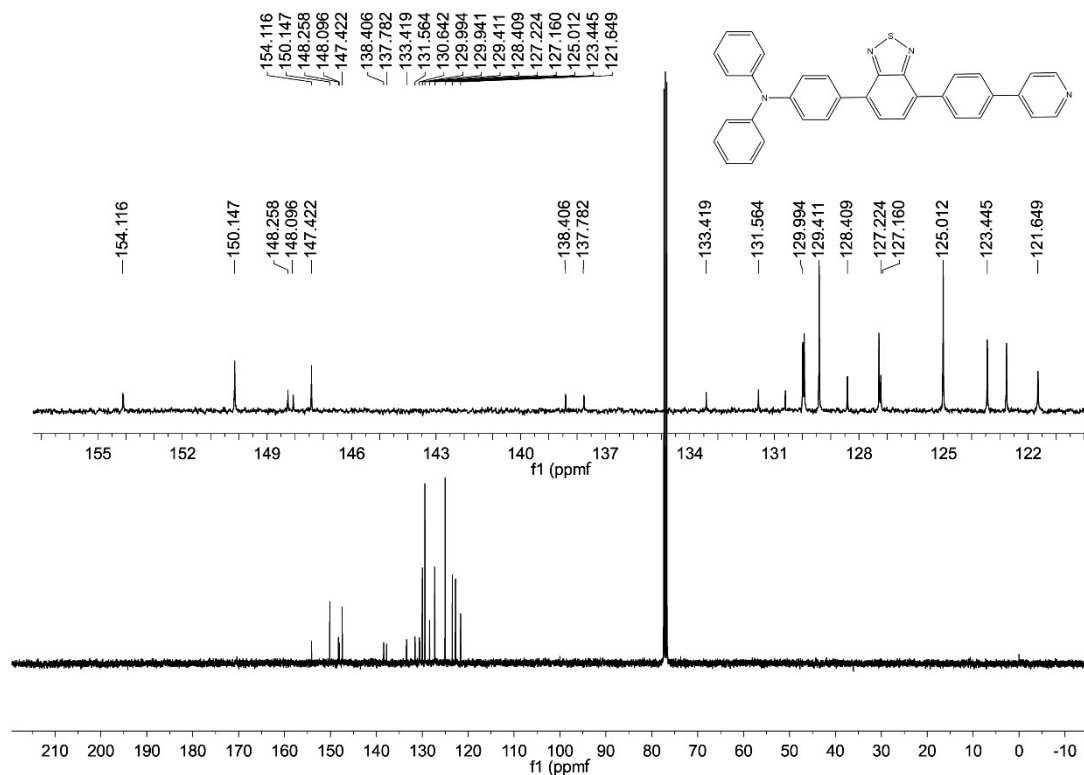

Figure S5. <sup>13</sup>C NMR spectrum spectrum of compound **2** in CDCl<sub>3</sub>.

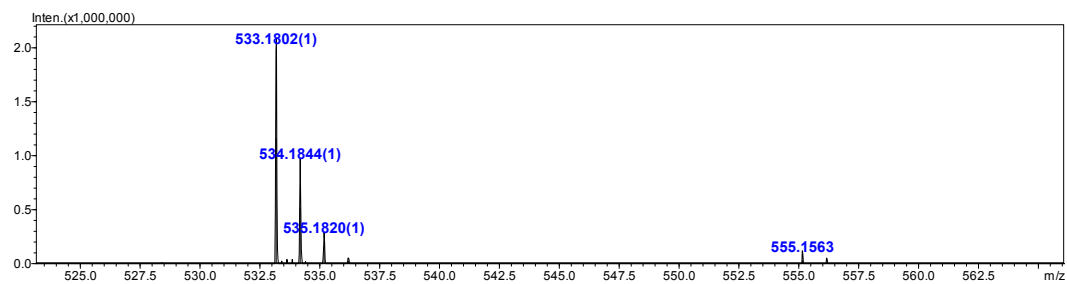

Figure S6. HRMS spectrum of compound **2**.

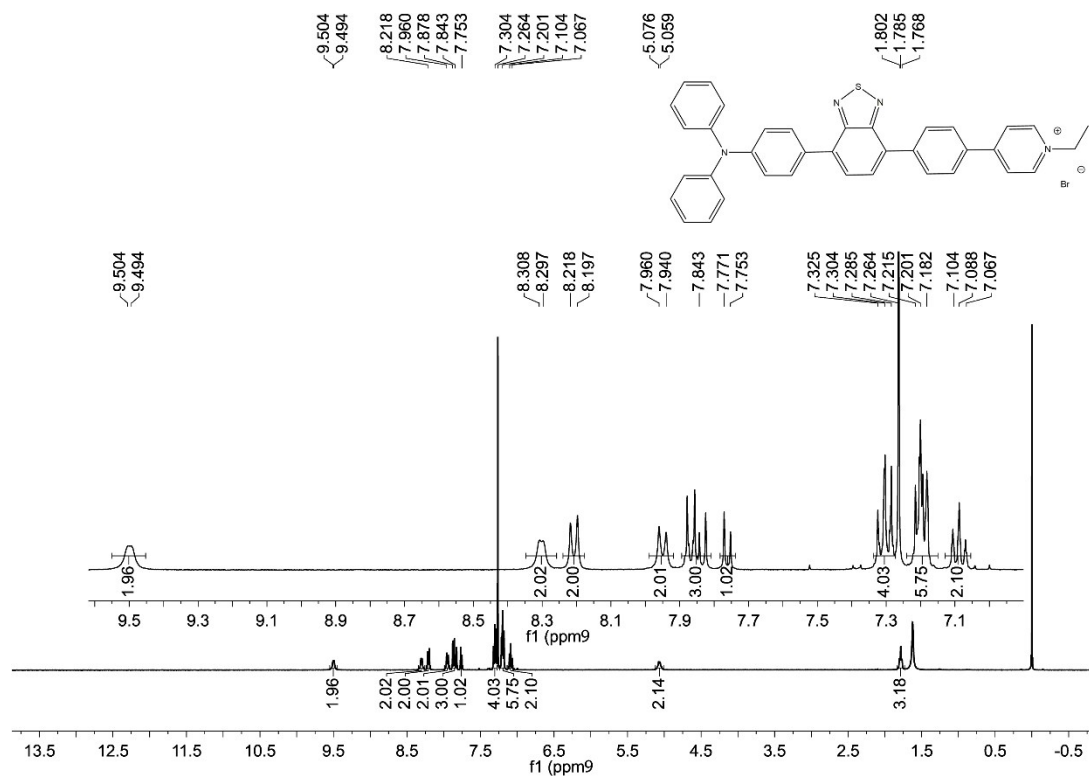

Figure S7. <sup>1</sup>H NMR spectrum of TBBP in CDCl<sub>3</sub>

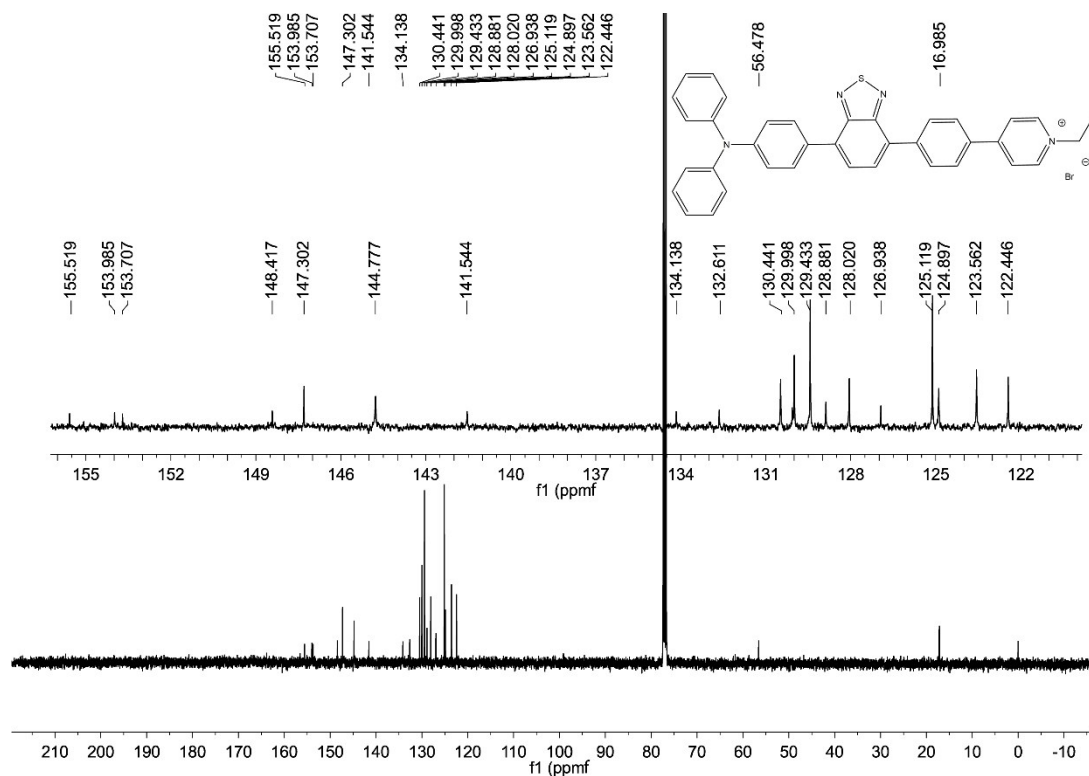

Figure S8. <sup>13</sup>C NMR spectrum of compound TBBP in CDCl<sub>3</sub>.

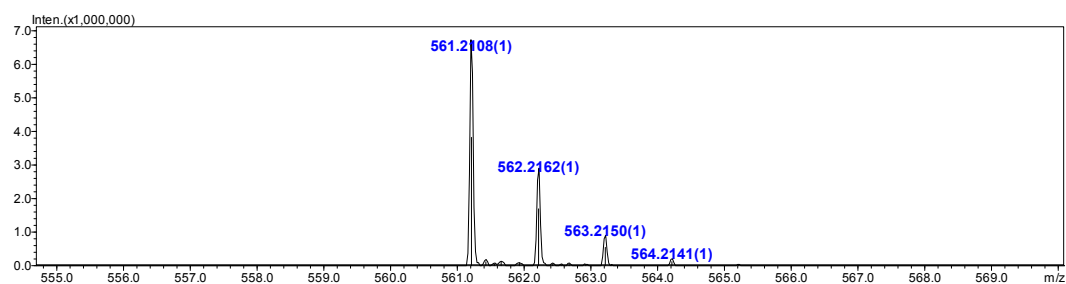

Figure S9. HRMS spectrum of compound **TBBP**.

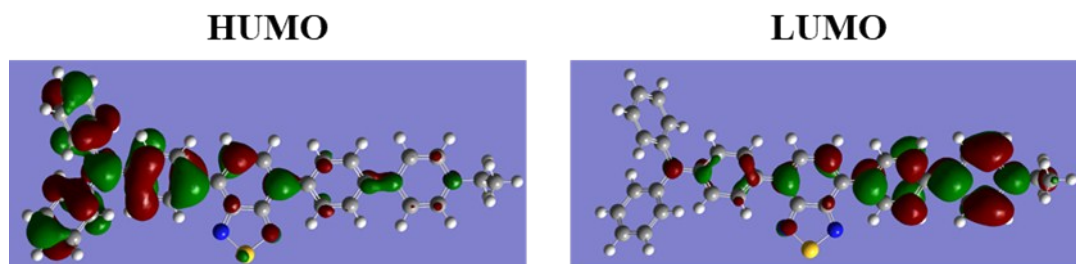

Figure S10. Molecular orbital amplitude plots of HOMO and LUMO of **TBBP**.

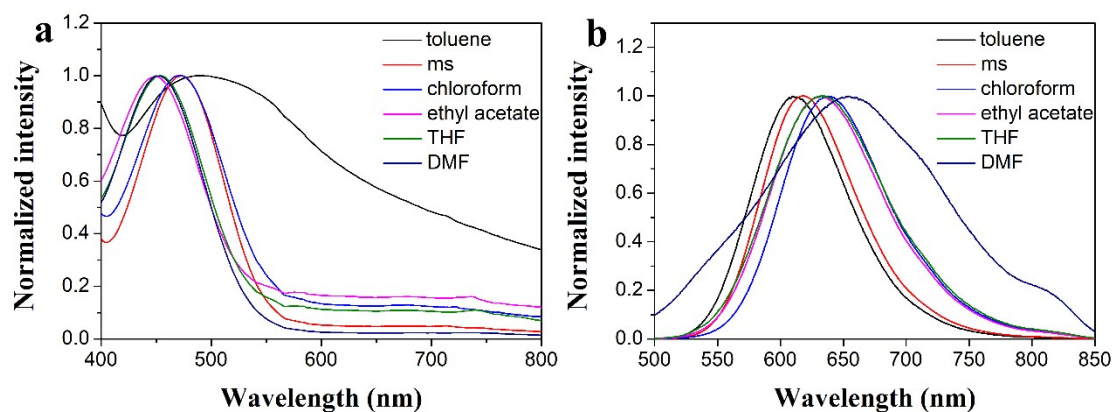

Figure S11. UV-Vis absorption (a) and emission spectra (b) of **TBBP**. ms: mixed solvents of

Toluene and  $\text{CHCl}_3$  with volume ratio about 1:1.

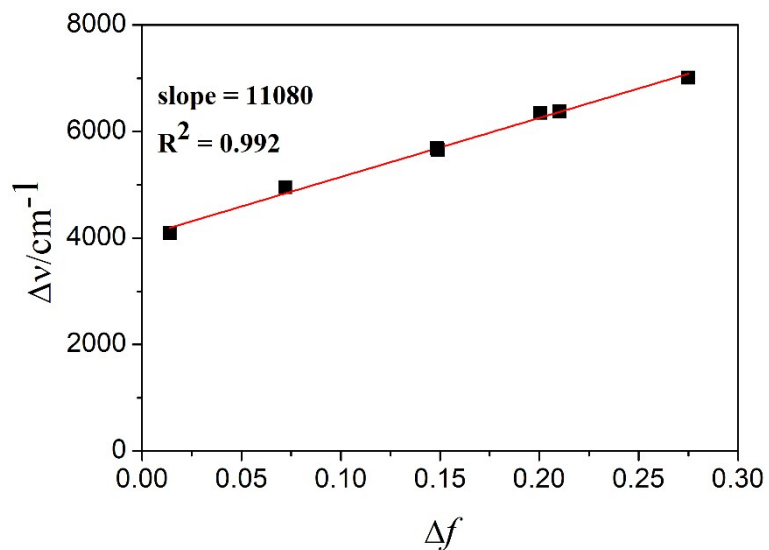

Figure S12. Plots of Stokes shift ( $\Delta\nu$ ) versus the solvent polarity function ( $\Delta f$ ) for **TBBP**.

Table S1. Solvent parameters.

| solvent       | $\epsilon$ | $n$   | $\Delta f$ |
|---------------|------------|-------|------------|
| toluene       | 2.24       | 1.496 | 0.113098   |
| ms            | 3.10       | 1.479 | 0.072100   |
| chloroform    | 4.81       | 1.443 | 0.149202   |
| ethyl acetate | 6.02       | 1.370 | 0.200506   |
| THF           | 7.58       | 1.405 | 0.210328   |
| DMF           | 36.7       | 1.428 | 0.275158   |

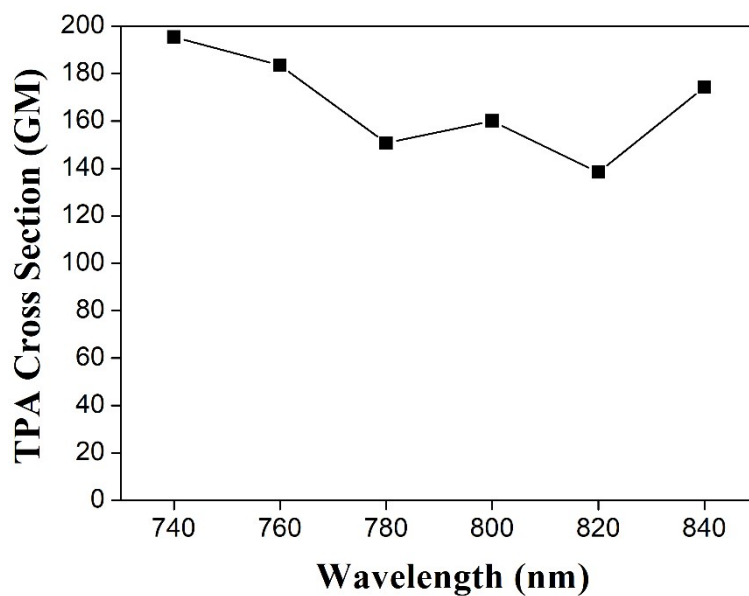

Figure S13. Two-photon absorption cross-section of **TBBP** in DMSO/water (1:9, v/v) for **TBBP**.

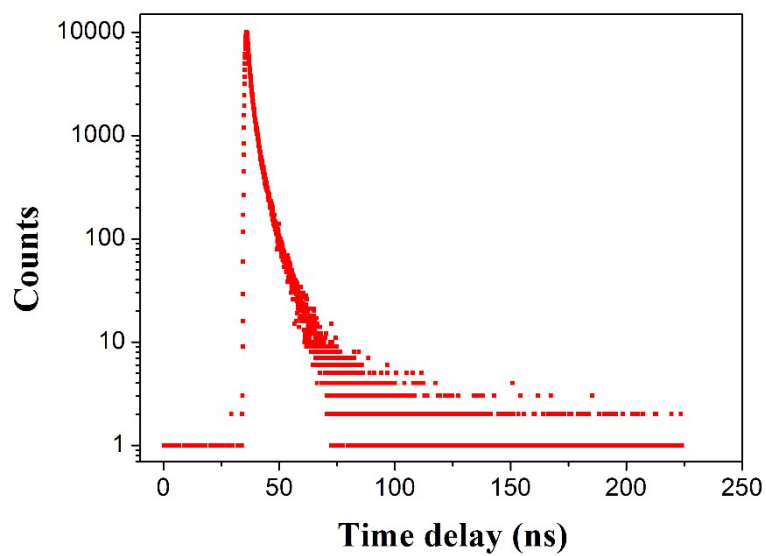

Figure S14. Fluorescence decay curves of **TBBP** in solid state.

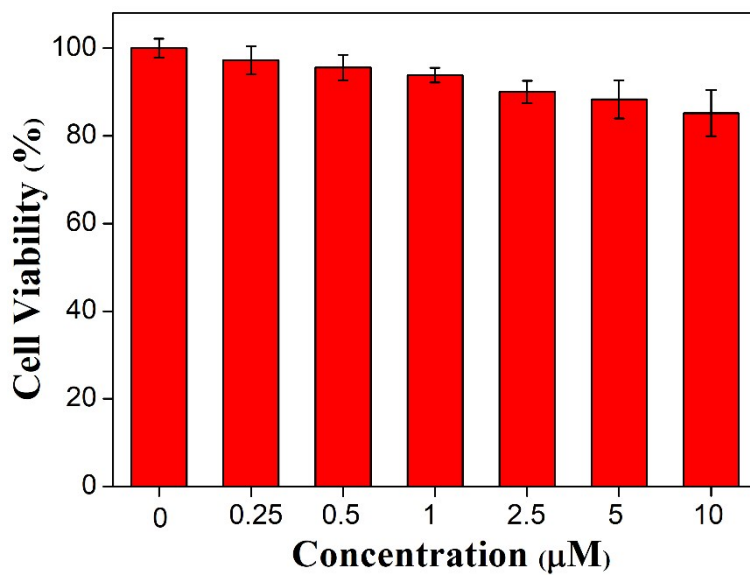

Figure S15. Cell viability assessed by MTT assay of HeLa cells incubated with different concentrations of **TBBP**.



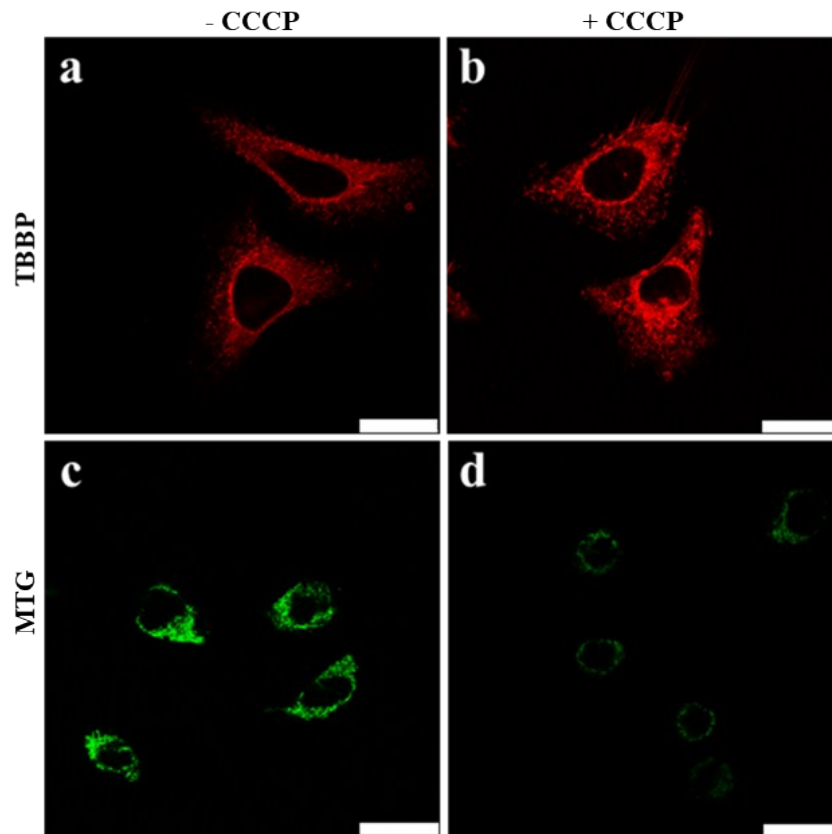

Figure S16. Confocal fluorescence images of CCCP (10  $\mu$ M) treated HeLa cells cultured with **TBBP** (4.0  $\mu$ M). Scale bar: 25  $\mu$ m

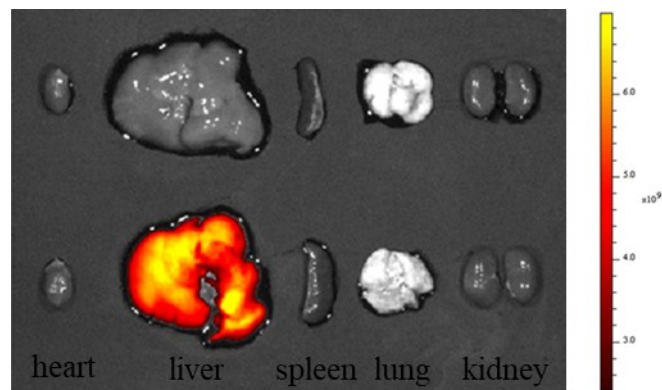

Figure S17. Ex vivo fluorescent images of mean organs from the mice administrated with AIEgen **TBBP**.

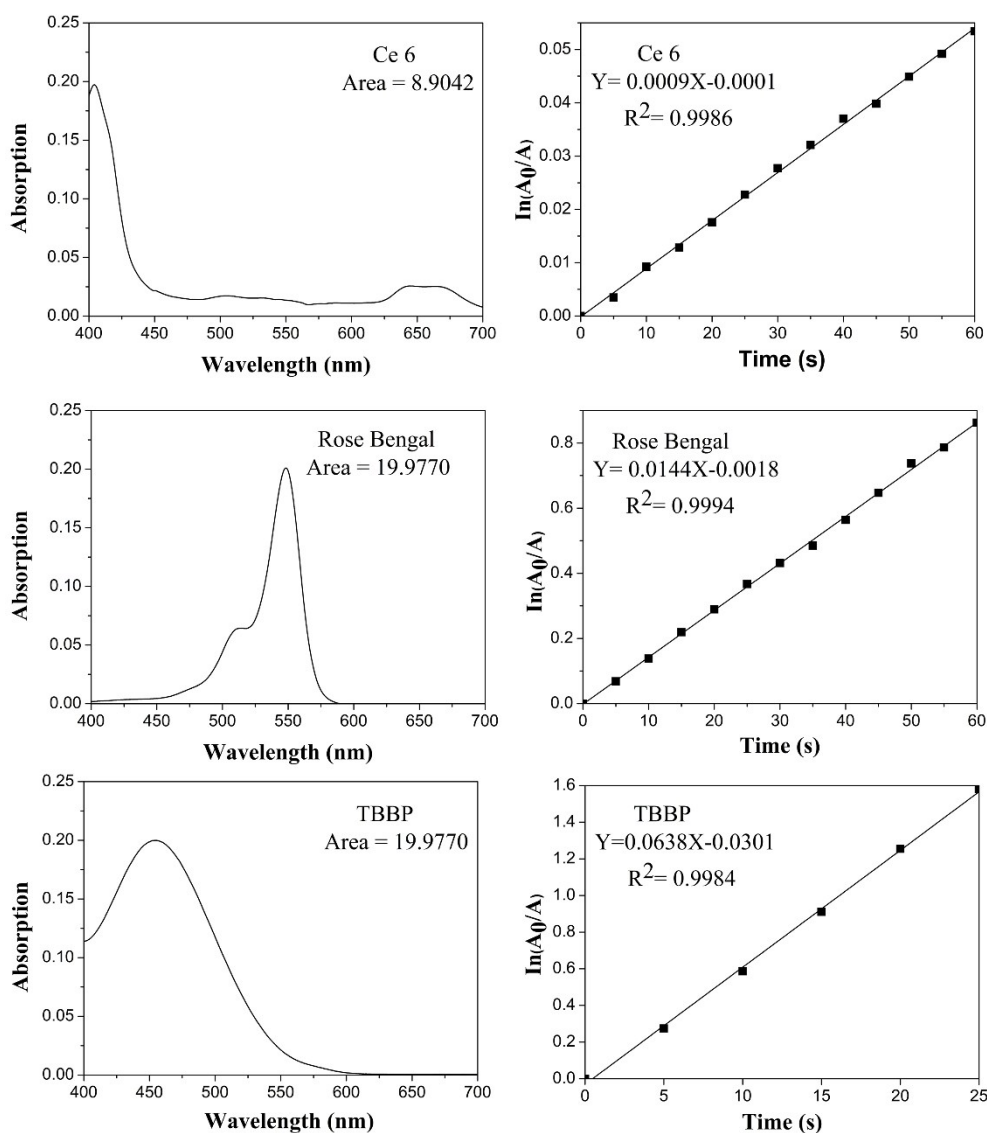

Figure S18. UV-vis spectra of ABDA in the presence of aggregates of **TBBP** under white light irradiation in water. Concentration:  $10 \times 10^{-6}$  M (**TBBP**) and  $5 \times 10^{-5}$  M (**ABDA**). The absorption peak area of **Ce6**, **Rose Bengal** and **TBBP**. The decomposition rate constants of ABDA by **Ce6**, **Rose Bengal** and **TBBP**.

Table S2. The  $^1O_2$  quantum yields of **TBBP**, **RB** and **Ce6**

| Compound    | <i>A</i> | <i>K</i> | $\Phi$ |
|-------------|----------|----------|--------|
| <b>TBBP</b> | 19.977   | 0.0638   | 1.36   |
| <b>RB</b>   | 8.1943   | 0.0144   | 0.75   |
| <b>Ce6</b>  | 8.9042   | 0.0009   | 0.043  |

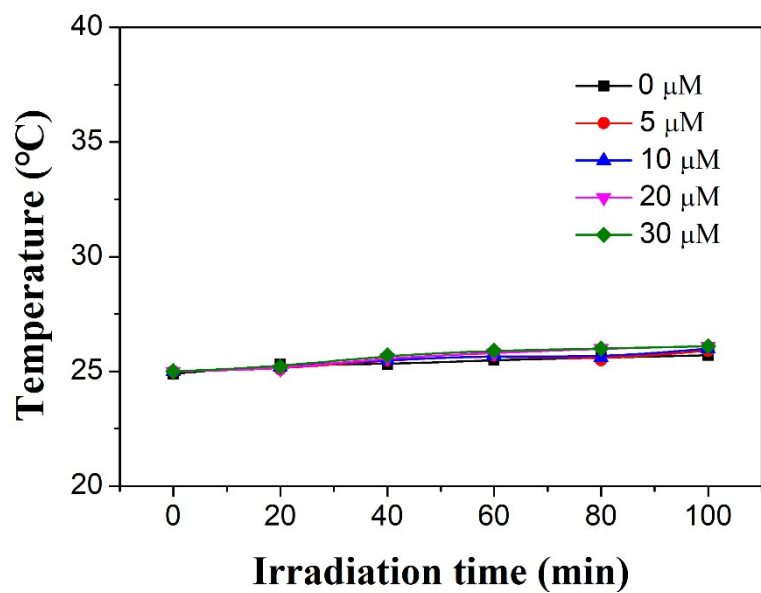

Figure S19. Photothermal conversion behaviors of the **TBBP** at different concentrations (5–30  $\mu\text{M}$ ) under white-light irradiation for different time.

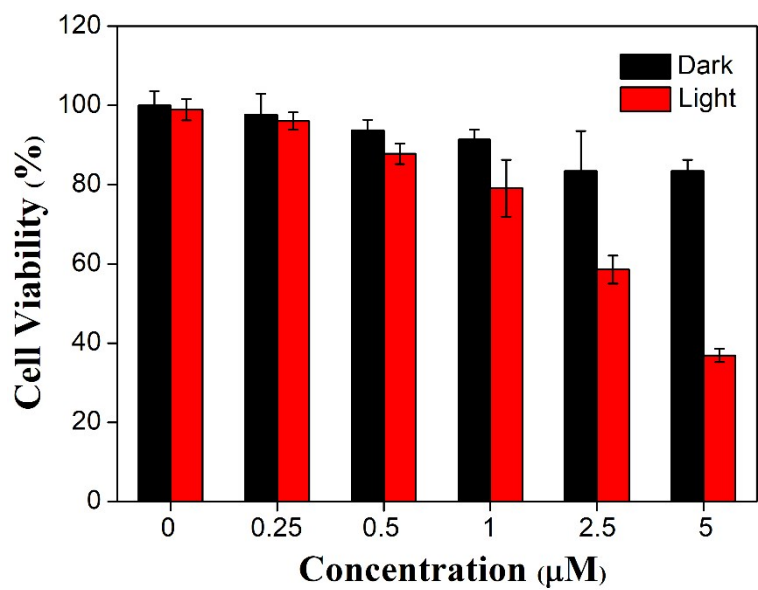

Figure S20. Cell viability of HeLa cells incubated with increasing concentrations of **Ce6** under dark or white light irradiation.

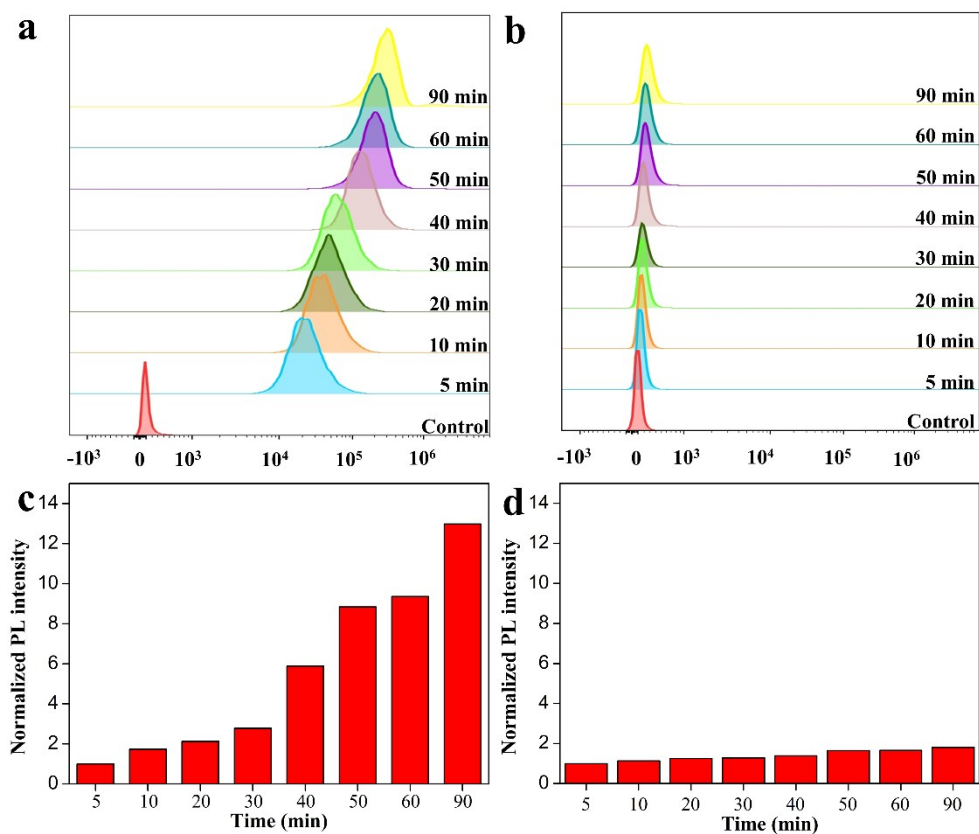

Figure S21. Flow cytometric analysis of HeLa cells treated with **TBBP** (a) and **Ce6** (b). The corresponding fluorescence intensity of HeLa cells treated with **TBBP** (c) and **Ce6** (d) after different treatments.

Movie of real-time dynamic change of **TBBP** (MOV).
